# Supplementary material
Source: HighWire-hosted journal article supplement (https://www.highwirestage.com/highwire/filestream/88340/field_highwire_adjunct_files/0/1228.pdf)
Supplement: 1228.pdf [file 1228.pdf]

**Table 1****Baseline demographic, clinical data at the time of ICU admission and ICU treatments**

| Variable                                                                | Reduced Diffusivity Group (n=7) | Control Group (n=20) | P-value†        |
|-------------------------------------------------------------------------|---------------------------------|----------------------|-----------------|
| Mean age (95% CI) – yr                                                  | 63 (55-71)                      | 63 (58-69)           | 0.98            |
| Male sex – no. (%)                                                      | 5 (71)                          | 15 (75)              | 1.00            |
| Mean BMI (95% CI) – kg/m <sup>2</sup>                                   | 36 (29–42)                      | 28 (25–29)           | <b>&lt;0.01</b> |
| Race or Ethnicity – no. (%)                                             |                                 |                      |                 |
| Asian                                                                   | 0 (0)                           | 1 (5)                | 0.99            |
| Black/African American                                                  | 1 (14)                          | 6 (30)               | 0.63            |
| White                                                                   | 2 (29)                          | 6 (30)               | 0.99            |
| Hispanic or Latino ethnic group                                         | 4 (57)                          | 7 (35)               | 0.39            |
| Comorbidities – no. (%)                                                 |                                 |                      |                 |
| Current Smoker                                                          | 2 (29)                          | 4 (22)               | 0.74            |
| Asthma                                                                  | 1 (14)                          | 1 (5)                | 0.45            |
| Obstructive Sleep Apnea                                                 | 5 (71)                          | 14 (70)              | 0.26            |
| Hypertension                                                            | 3 (43)                          | 13 (65)              | 0.39            |
| Diabetes                                                                | 4 (57)                          | 8 (40)               | 0.66            |
| Chronic kidney disease                                                  | 1 (14)                          | 2 (10)               | 1.00            |
| Other comorbidities*                                                    | Variable                        | Variable             | > 0.05          |
| Presenting symptoms – no. (%)                                           |                                 |                      |                 |
| Fever                                                                   | 5 (71)                          | 10 (50)              | 0.40            |
| Cough                                                                   | 5 (71)                          | 12 (60)              | 0.68            |
| Somnolence/Lethargy                                                     | 2 (29)                          | 3 (15)               | 0.58            |
| Witnessed cardiac arrest                                                | 0 (0)                           | 1 (5)                | 1.00            |
| Other symptoms**                                                        | Variable                        | Variable             | > 0.05          |
| Mean duration dyspnea pre-ICU admission (95% CI) – day                  | 11 (7-14)                       | 8 (5-12)             | 0.41            |
| Mean lowest pulse oximetry pre-ICU admission (95% CI) - %               | 82 (70-93)                      | 80 (70-90)           | 0.84            |
| Mean SOFA score at ICU admission (95% CI) ***                           | 9.3 (6.8–11.8)                  | 7 (5.4-8.7)          | 0.09            |
| P/F ratio at ICU admission < 150 – no. (%)                              | 3 (43)                          | 14 (74)              | 0.19            |
| Mean worst arterial pO <sub>2</sub> first 24-hrs in ICU (95% CI) - mmHg | 84 (67-100)                     | 90 (72-108)          | 0.55            |
| Mean lowest O <sub>2</sub> sat first 24-hrs in ICU (95% CI) - %         | 86 (80-92)                      | 85 (80-90)           | 0.81            |
| Intubated during ICU stay – no. (%)                                     | 7 (100)                         | 19 (95)              | 1.00            |
| Administration of Hydromorphone †† – no. (%)                            | 6 (85.7)                        | 19 (95)              | 0.46            |
| ECMO treatment – no. (%)                                                | 0 (0)                           | 1 (5)                | 1.00            |
| Inhaled Nitric Oxide Gas Therapy – no. (%)                              | 4 (57)                          | 5 (25)               | 0.17            |
| Mean time from ICU admission to MRI (95% CI) – day                      | 24 (16-32)                      | 22 (16-26)           | 0.58            |

**Table 1** shows the demographics and baseline clinical characteristics of patients in both the “leukoencephalopathy with reduced diffusivity” and control groups.

\*: Chronic lung disease, hypertension, diabetes, hyperlipidemia, peripheral vascular disease, liver disease, cancer, immunodeficiency, autoimmune disorders, pre-existing neurological disease, stroke, primary coagulopathy, anticoagulation, other conditions; all p-values > 0.05.

\*\*: Myalgias, fatigue, loss of taste/smell, shortness of breath, diarrhea, abdominal pain, headache, rhinorrhea, sore throat, chills, back pain, and other miscellaneous symptoms; all p-values > 0.05.

\*\*\*: Sequential Organ Failure Assessment score

†: P-values have not been adjusted for multiple testing and should not be used to infer definitive effects.

††: There was also no statistical difference in the proportion of patients receiving other sedatives and opioids (e.g., Midazolam, Propofol, Sulfentanil, Dexmedetomidine, Isoflurane, etc.).

**Table 2****Intensive Care and Outcome data**

| Variable                                                          | Reduced Diffusivity Group (n=7) | Control Group (n=20) | P-value†    |
|-------------------------------------------------------------------|---------------------------------|----------------------|-------------|
| <b>Organ damage reported in the ICU* – no. (%)</b>                |                                 |                      |             |
| Acute renal failure                                               | 7 (100)                         | 9 (45)               | 0.06        |
| Cardiac events                                                    | 2 (29)                          | 2 (10)               | 0.28        |
| Acute liver failure                                               | 1 (14)                          | 2 (10)               | 1.00        |
| Ischemic bowel                                                    | 1 (14)                          | 2 (10)               | 0.99        |
| Septic shock                                                      | 6 (86)                          | 18 (90)              | 0.99        |
| Mean no. organ systems affected** - no. (95% CI)                  | 2.4 (1.4-2.1)                   | 1.8 (1.5-3.3)        | 0.10        |
| <b>Laboratory data within 24-hrs prior to MRI</b>                 |                                 |                      |             |
| Mean lowest hemoglobin (95% CI) – g/dl                            | 8.1 (7.4-8.7)                   | 10.2 (9.2-11.3)      | <b>0.02</b> |
| Mean RDW (95% CI) – CV                                            | 15.8 (14.5-17.1)                | 16.2 (15.4-17)       | 0.60        |
| Mean platelet (95% CI) – 1000/μL                                  | 229 (189–270)                   | 313 (231– 95)        | 0.23        |
| Median lymphocyte count (IQR) – 1000/μL                           | 1.1 (0.4)                       | 1.5 (1.4)            | 0.26        |
| Mean highest serum sodium (95% CI) – mmol/L                       | 147 (139–154)                   | 139 (137–141)        | <b>0.04</b> |
| Median eGFR (IQR) – mL/min                                        | 49 (39)                         | 85 (87)              | 0.06        |
| Median of average WBC count (IQR) – 1000/μL                       | 8.6 (5.5)                       | 8.7 (4)              | 0.93        |
| Median highest D-dimers (IQR) – ng/mL                             | 4080 (4342)                     | 2386 (3826)          | 0.09        |
| Median C-reactive protein (IQR) – mg/L                            | 42 (123)                        | 55 (112)             | 0.57        |
| Mean fibrinogen (95% CI) – mg/dL                                  | 591 (494–687)                   | 582 (490–74)         | 0.88        |
| Extubated at time of MRI – no. (%)                                | 1 (14)                          | 9 (45)               | 0.20        |
| Mean worst arterial pO <sub>2</sub> on day of MRI (95% CI) - mmHg | 115 (92-138)                    | 84 (67-101)          | 0.02        |
| Mean lowest O <sub>2</sub> sat on day of MRI (95% CI) - %         | 98 (95-100)                     | 93 (91-95)           | 0.007       |
| <b>Outcome data</b>                                               |                                 |                      |             |
| Death at the time of the last follow-up – no. (%)                 | 2 (28.6)                        | 3 (15)               | 0.57        |
| Discharged from the ICU***                                        | 2 (28.6)                        | 12 (60)              | 0.21        |

**Table 2** shows selected clinical and laboratory findings collected within 24-hours before MRI acquisition.

\*: As documented in the ICU clinical notes of the Electronic Medical Record (EMR).

\*\*: Organ systems include lung, heart, kidney, liver, bowel, septic shock, and DIC

\*\*\*: This category includes patients in a step-down unit, regular inpatient ward, or outpatients.

†: P-values have not been adjusted for multiple testing and should not be used to infer definitive effects.

**Table 3****Neuroimaging findings**

| <b>Brain MRI Findings</b>                                          | <b>Reduced Diffusivity group (N=7)</b> | <b>Control group (N=20)</b> | <b>P-value†</b>  |
|--------------------------------------------------------------------|----------------------------------------|-----------------------------|------------------|
| <b>White matter severity score* - median (IQR)</b>                 |                                        |                             |                  |
| Supratentorial                                                     | 3 (1)                                  | 1 (1)                       | <b>&lt;0.001</b> |
| Infratentorial                                                     | 2 (2)                                  | 0 (1)                       | <b>0.002</b>     |
| <b>Distribution of white matter signal abnormalities – no. (%)</b> |                                        |                             |                  |
| Predominantly symmetrical distribution ***                         | 7 (100)                                | 11/19 (58)                  | 0.06             |
| U-fiber involvement ***                                            | 1 (14)                                 | 7/19 (37)                   | 0.37             |
| Corpus callosum                                                    | 2 (29)                                 | 6 (30)                      | 0.99             |
| Middle Cerebellar peduncles                                        | 6 (86)                                 | 1 (5)                       | <b>&lt;0.001</b> |
| Cerebellar white matter                                            | 4 (57)                                 | 0 (0)                       | <b>0.002</b>     |
| Brainstem                                                          | 3 (43)                                 | 1 (5)                       | <b>0.04</b>      |
| <b>Additional Neuroimaging findings – no. (%)</b>                  |                                        |                             |                  |
| Number of micro-hemorrhages > 10                                   | 3 (43)                                 | 9 (53)                      | 0.99             |
| Cortical laminar necrosis                                          | 1 (14)                                 | 0 (0)                       | 0.26             |
| Abnormal deep gray matter signal                                   | 1 (14)                                 | 5(25)                       | 0.99             |
| Parenchymal enhancement **                                         | 1/4 (25)                               | 1/7 (14)                    | 0.99             |
| Leptomeningeal enhancement **                                      | 0/4 (0)                                | 0/7 (0)                     | 1.00             |

**Table 3** presents the neuroimaging findings, including a qualitative 4-point Likert white matter severity score\* for the degree of infratentorial and supratentorial white matter signal abnormality; 0=normal, 1=mild (<25%), 2=moderate (25-50%), 3=severe (>50%).

\*\* Only 4/7 MRI exams in the reduced diffusivity group and 7/20 in the control group included post-contrast imaging.

\*\*\* Calculations based on 19/20 patients with white matter lesions in the control group; one patient in the control group had a supratentorial and infratentorial white matter severity score of 0.

†: P-values have not been adjusted for multiple testing and should not be used to infer definitive effects.
